# Supplementary material for: T cell and autoantibody profiling for primary immune regulatory disorders
Source: bioRxiv or medRxiv preprint supplement (doi:10.1101/2024.02.25.24303331), 2025-01-27

Supplementary Fig. 2

Autoantibodies

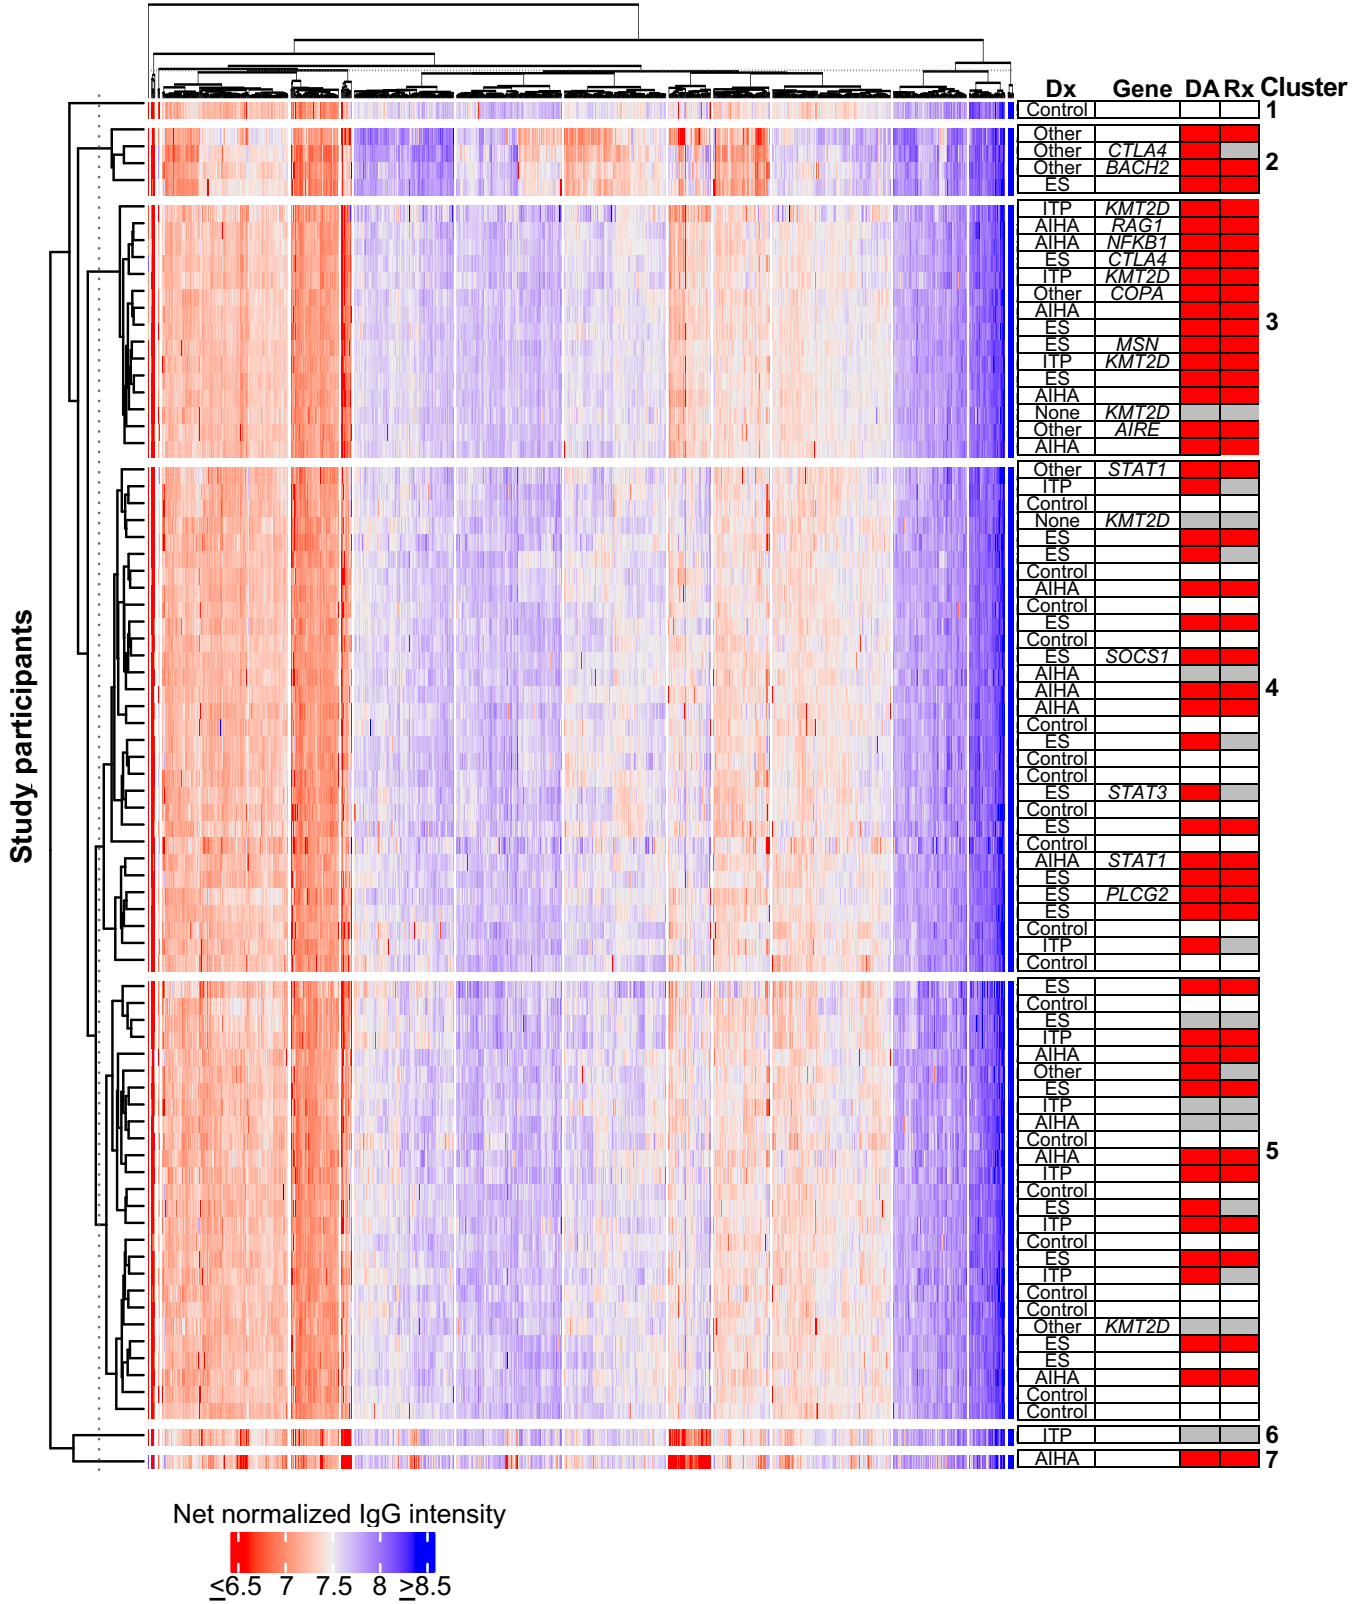

Supplement: Supplementary file [file media-2.pdf]
